# Supplementary material
Source: HighWire-hosted journal article supplement (http://asnr-client.stage.highwire.org/highwire/filestream/183404/field_highwire_adjunct_files/0/0484.pdf)
Supplement: 0484.pdf [file 0484.pdf]

**Table - 1 Population characteristics (n=26) expressed as average and standard deviation or frequency in percent.**

| Mother characteristics                                | IUGR             |
|-------------------------------------------------------|------------------|
| Maternal age at pregnancy                             | 32.38 $\pm$ 5.26 |
| Number of previous births                             | 1.11 $\pm$ 1.21  |
| Normal maternal health                                | 17 (65%)         |
| Thyroid disorders                                     | 3 (11.5%)        |
| Blood clotting disorders                              | 1 (3.8%)         |
| Anemia                                                | 1 (3.8%)         |
| Hypertension                                          | 1 (3.8%)         |
| Pre gestational diabetes                              | 1 (3.8%)         |
| Characteristics of previous pregnancies               |                  |
| Pre -eclampsia                                        | 2 (7.7%)         |
| IUGR pregnancy                                        | 5 (19%)          |
| Artificial abortion                                   | 6 (23%)          |
| Current pregnancy characteristics                     |                  |
| Spontaneous conception                                | 21 (80%)         |
| Fetus of male sex                                     | 15 (57%)         |
| Fetus of female sex                                   | 11 (42%)         |
| Pregnancy follow-up - a proper biochemical survey     | 15 (57%)         |
| Pregnancy follow-up - normal sonographic reviews      | 16 (61%)         |
| Performing MRI examination for the indication of IUGR | 26 (100%)        |
| Gestational age at the time of the MRI examination    | 33.31 $\pm$ 2.79 |
|                                                       |                  |

| Mildly abnormal brain findings included in the study |               |
|------------------------------------------------------|---------------|
| Changes in white matter                              | 1 (3.8%)      |
| Changes in gray matter                               | 1 (3.8%)      |
| Disorders of the corpus callosum                     | 1 (3.8%)      |
| Lateral ventricles asymmetry                         | 2 (7.7%)      |
| Other                                                | 3 (11.5%)     |
| Characteristics of IUGR                              |               |
| Gestational age at the time of IUGR diagnosis        | 28 ± 4.55     |
| Growth percentage (Dolberg) near diagnosis           | 7.8 ± 5.95    |
| Growth percentage (Dolberg) near MRI examination     | 7.42 ± 5.93   |
| Growth percentage (Dolberg) at birth                 | 4.04 ± 3.29   |
| Fetuses defined as severe (<3%) IUGR Pregnancy       | 16 (61%)      |
| Newborn characteristics                              |               |
| Spontaneous vaginal birth                            | 4/25 * (16%)  |
| Cesarean delivery                                    | 21/25 * (84%) |
| Week of birth                                        | 35.04 ± 2.66  |
| Hospitalization in NICU                              | 15 (57.7%)    |
| Hospitalization of the newborn in intensive care     | 2/25 * (8%)   |
| Apgar 9/10                                           | 20/25 * (80%) |
